# Supplementary material
Source: Springer Nature journal article supplement (https://www.springermedizin.de/resource/supplementary/12885_2009_2471_MOESM7_ESM.pdf/9461388)
Supplement: MOESM7 [file 9461388]

**A**

GATA-1/V\$GATA1\_02  
 CP2/V\$CP2\_01  
 SREBP-1/V\$SREBP1\_01  
 USF/V\$USF\_Q6

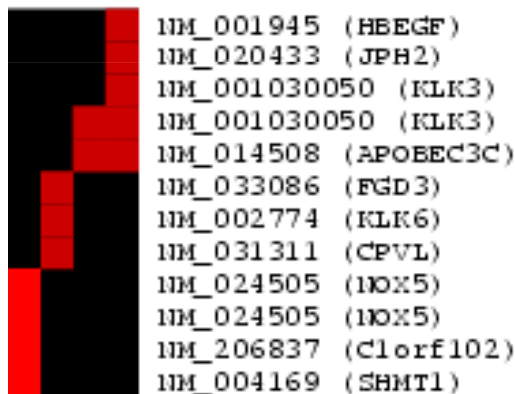

Up-regulated in PC3-AKR1C3

**B**

ATF/V\$ATF\_01  
 MYOD/V\$MYOD\_01  
 E2/V\$E2\_01  
 Elk-1/V\$ELK1\_01

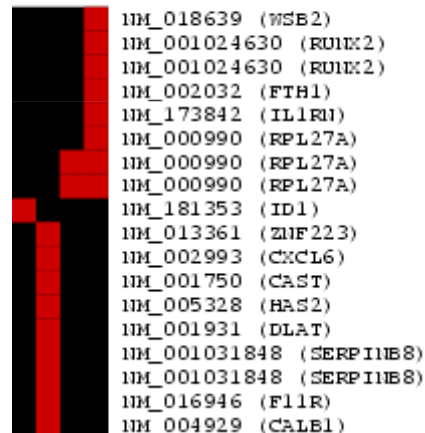

Down-regulated in PC3-AKR1C3
